# Supplementary figures and images for: A cartridge based Point-of-Care device for complete blood count
Source: Springer Nature journal article supplement (doi:10.1038/s41598-019-54006-3), 2019-12-09

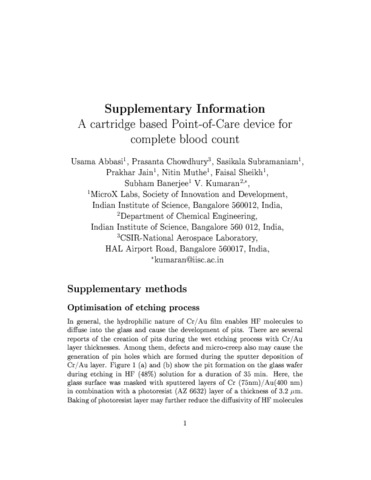

Supplement: MOESM1 [file 41598_2019_54006_MOESM1_ESM.pdf]
